# Supplementary material for: Unusual solvent-mediated hydrolysis of dicarboxylate monoester ligands in copper(ii) complexes toward simultaneous crystallization of new dicarboxylate derivatives
Source: Royal Society of Chemistry journal article supplement (doi:10.1039/c4ra05776g), 2014-01-01
Supplement: c4ra05776g1.pdf [file c4ra05776g1.pdf]

## Supporting information

### Unusual solvent-mediated hydrolysis of dicarboxylate monoester ligands in copper(II) complexes toward simultaneous crystallization of new dicarboxylate derivatives

Jayanta Kumar Nath, Alexander M. Kirillov and Jubaraj B. Baruah

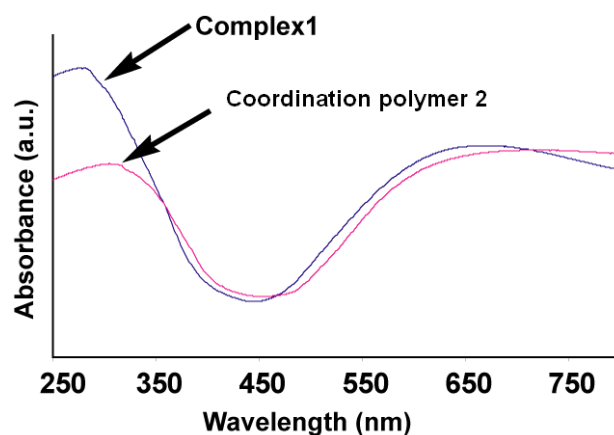

Figure 1S: Solid state UV-visible spectra of complex 1 and coordination polymer 2.

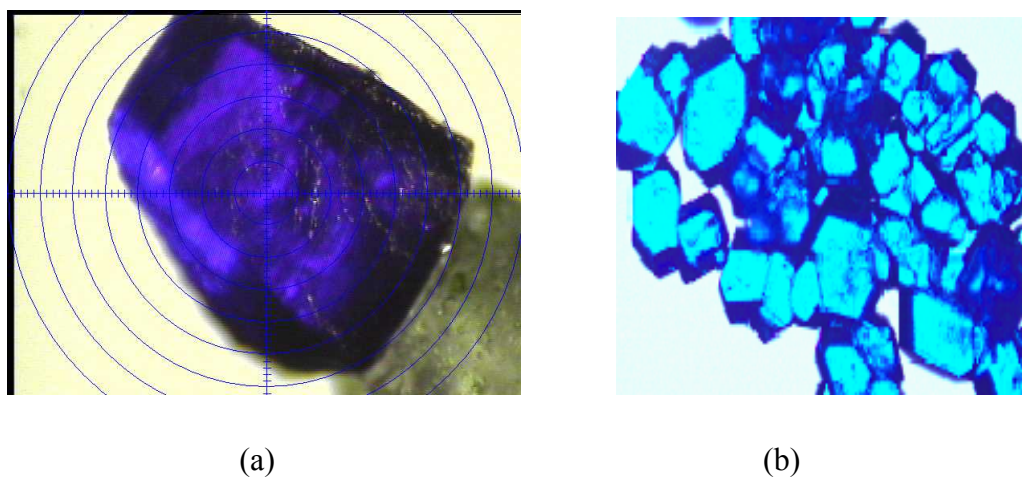

Figure 2S: Crystal/s morphology of (a) complex 1 and (b) coordination polymer 2.

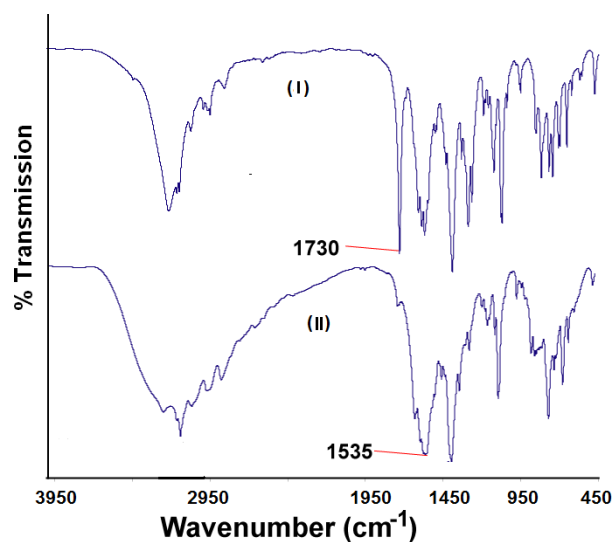

Figure 3S: FT-IR spectra (KBr, cm<sup>-1</sup>) of the crystals of the (I) complex **1** (top) and (II) complex **1** transformed to crystals of coordination polymer **2** in solid state (bottom).

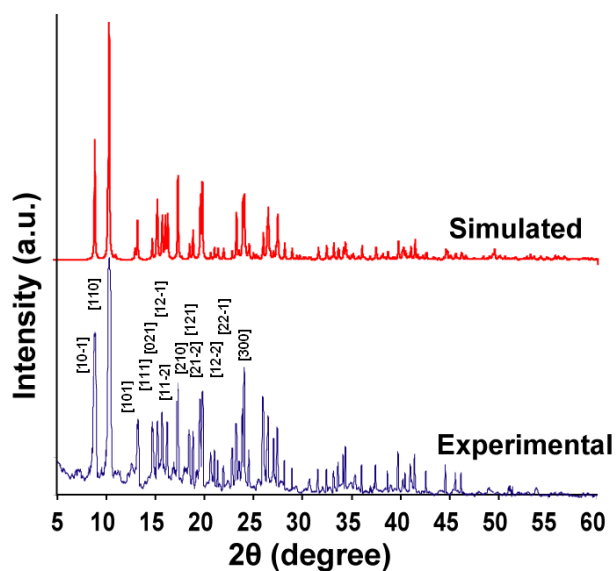

Figure 4S: Experimental and theoretical powder-XRD patterns of metallacycle **4**.

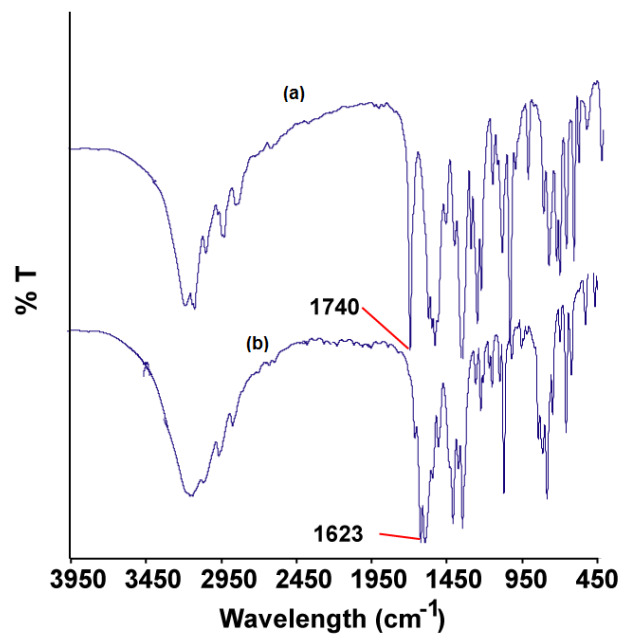

Figure 5S: FT-IR (KBr) spectra of (a) complex **3** and (b) complex **4**.

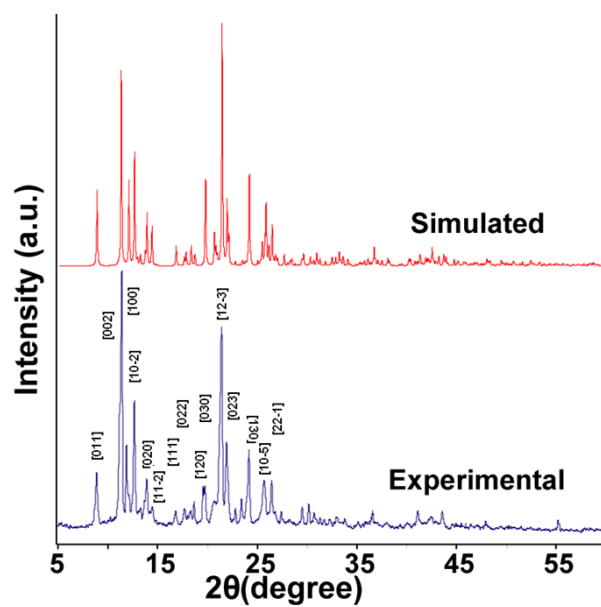

Figure 6S: Experimental and theoretical powder-XRD patterns of the complex **5**.

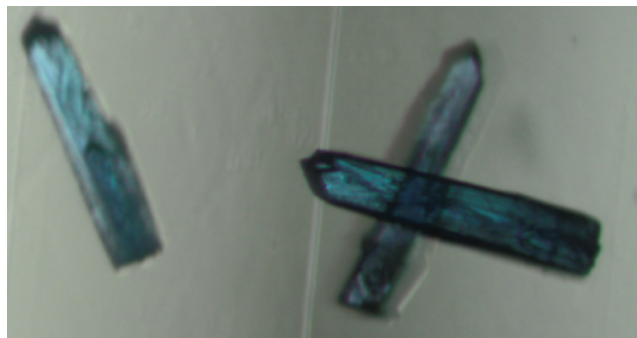

(a)

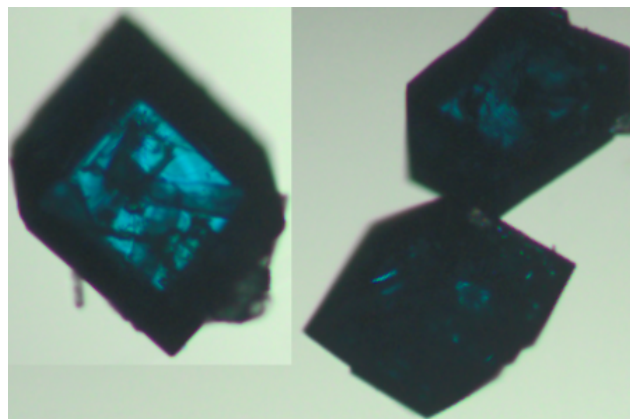

(b)

Figure 7S: Images of crystals of (a) complex **3** and (b) complex **4**.
